# Supplementary material for: MicroRNA Profiling Reveals an Abundant ssc-miRNA-148a-3p that Promotes Proliferation and Differentiation during Intramuscular Adipogenesis in Chinese Guizhou Congjiang Pigs Breeds by targeting PPARGC1A
Source: Research Square preprint supplement (doi:10.21203/rs.3.rs-818015/v1), 2021-08-19
Supplement: Supplementary file 3 [file 8dbedbb3ff8736d1f407ec9a.xlsx]

## Sheet: Sheet1
Table S1. The stem-loop primers were used for reverse-transcribed cDNA of miRNA
Gene	Primer fragment (5＇→3＇)
Stem loop sequence	GGTCGTATGCAAAGCAGGGTCCGAGGTATCCATCGCACGCATCGCACTGCATACGACC
stem loop primer miR-148a-3p	GGTCGTATGCAAAGCAGGGTCCGAGGTATCCATCGCACGCATCGCACTGCATACGACCACAAAGTTCT
stem loop primer miR-34c	GGTCGTATGCAAAGCAGGGTCCGAGGTATCCATCGCACGCATCGCACTGCATACGACCGCAACAGCT
stem loop primer miR-100	GGTCGTATGCAAAGCAGGGTCCGAGGTATCCATCGCACGCATCGCACTGCATACGACCCACAAGTTCG
stem loop primer miR-126-3p	GGTCGTATGCAAAGCAGGGTCCGAGGTATCCATCGCACGCATCGCACTGCATACGACCCGCATTATTA
stem loop primer miR-199b-5p	GGTCGTATGCAAAGCAGGGTCCGAGGTATCCATCGCACGCATCGCACTGCATACGACCAACAGATAGT
stem loop primer miR-222	GGTCGTATGCAAAGCAGGGTCCGAGGTATCCATCGCACGCATCGCACTGCATACGACCGAGACCCAGT
stem loop primer miR-381-3p	GGTCGTATGCAAAGCAGGGTCCGAGGTATCCATCGCACGCATCGCACTGCATACGACCACAGAGAGCT
stem loop primer miR-455-5p	GGTCGTATGCAAAGCAGGGTCCGAGGTATCCATCGCACGCATCGCACTGCATACGACCCGATGTAGTC
novel 25	GGTCGTATGCAAAGCAGGGTCCGAGGTATCCATCGCACGCATCGCACTGCATACGACCCTAGTGGTCC
