# Supplementary material for: MicroRNA Profiling Reveals an Abundant ssc-miRNA-148a-3p that Promotes Proliferation and Differentiation during Intramuscular Adipogenesis in Chinese Guizhou Congjiang Pigs Breeds by targeting PPARGC1A
Source: Research Square preprint supplement (doi:10.21203/rs.3.rs-818015/v1), 2021-08-19
Supplement: Supplementary file 4 [file f1e8eb0b9f5965ac638c0111.xlsx]

## Sheet: Sheet1
Table S1. Oligonucleotide Primers Used for Quantitative Real-Time PCR.
Gene	Primer fragment (5＇→3＇)	Accession number	Product size (bp)	Tempreture(℃)
APOE	F: TTTGGTGGTAACCCTCCTCG	NM_214308.1	179	60
	R: CCTCCTGCACTTGGTCAGA
CEBPα	F: TGGAAACGCAAACTCACCG	XM_003127015.4	250	60
	R: GGTTCAAAGCCCCAAGTCC
LPL	F: CGACGCAGATTTTGTAGACG	NM_214286.1	205	60
	R: CTCATGGGAGCACTTCACG
HSL	F: CAGGTGTCTTTGCGGGTAT	NM_214315.3	181	60
	R: GCCACGTAGCGTGATTTGT
FABP4	F:CAGGAAAGTCAAGAGCACCA	NM_001002817.1	226	60
	R:CGGGACAATACATCCAACAG
FASN	TCAACCCCAACGGTCTGTTC	NM_001099930.1	176	60
	CGGGCTGACGTCGAACTTAT
PPARγ	TGTCAGTTTCGCTCCGTG	NM_214379.1	117	60
	GTGGACGCCATACTTTAGGA
CDK2	F: CTTTGGAGTCCCTGTTCGTA	NM_001285465.1	104	60
	R: TGTCCACGGCTGTAGAGTAGTA
CDK3	F: ATGAGGTGGTGACACTCTGGT	XM_003131201.3	176	60
	R: CAGGGTCCGAAAGATACGA
CDK4	F: TGCCACTGCCCGAACT	NM_001123097.1	233	60
	R: GCTTGACTGTCCCACCACTT
CyclinG1	F: CTTCTCGGATCTAATATCGTGG	NM_001031781.2	247	60
	R: CAAAGTCCCTCAGTCTTGCA
CyclinB	F: GAACTGCTCTTGGAGACATCG	NM_001170768.1	159	60
	R: GCTGGGGCTCTAATACAGGTAC
CyclinD1	F:AGAAGTTGTGCATCTACACCGAC	XM_021082686.1	95	60
	R: CGCCAGGTTCCACTTGAGTT
Bcl2	F: GTGGCCTTCTTTGAGTTCG	XM_021099593.1	145	60
	R: CCCAGCCTCCGTTATCC	XM_021099593.1
Bax	F: CCGAAATGTTTGCTGACG	XM_003127290.5	154	60
	R:AGCCGATCTCGAAGGAAGT
Caspase-3	F: GACCATAGCAAAAGGAGCAG	NM_214131.1	232	60
	R: ACGCCATGTCATCTTCAGTC
GAPDH	F: GGTCGGAGTGAACGGATTT	NM_001206359.1	247	60
	R: CCATTTGATGTTGGCGGGAT
U6	F: GGACCAGCAACAAACTACCAAC	NM_001244928.1	123	60
	R: TACGCATGTAACCTGCCTCGA
miR-148a-3p-F	GGCAGCGATTCAGTGCACTAC		90	60
miR-34c-F	CGGGCAGGCAGTGTAGTTAGC		77	60
novel 25-F	GGCGTGAAATGTTTAGGACCA		74	60
miR-100-F	GGCTGAACCCGTAGATCCGAA		76	60
miR-126-3p-F	CGGGCTCGTACCGTGAGTAAT		76	60
miR-199b-5p-F	CAGGCATCCCAGTGTTTAGAC		78	60
miR-222-F	CGGGCAGCTACATCTGGCTAC		78	60
miR-381-3p-F	CGGCGGTATACAAGGACAAGCT		77	60
miR-455-5p-F	ACGGGCTATGTGCCTTTGGACT		77	60
miR-Universal/Q-R	CAAAGCAGGGTCCGAGGTATC
