# Supplementary figures and images for: MicroRNA Profiling Reveals an Abundant ssc-miRNA-148a-3p that Promotes Proliferation and Differentiation during Intramuscular Adipogenesis in Chinese Guizhou Congjiang Pigs Breeds by targeting PPARGC1A
Source: Research Square preprint supplement (doi:10.21203/rs.3.rs-818015/v1), 2021-08-19

**Figure S3.** The known miRNA nucleotide bias at each position.

**a.**


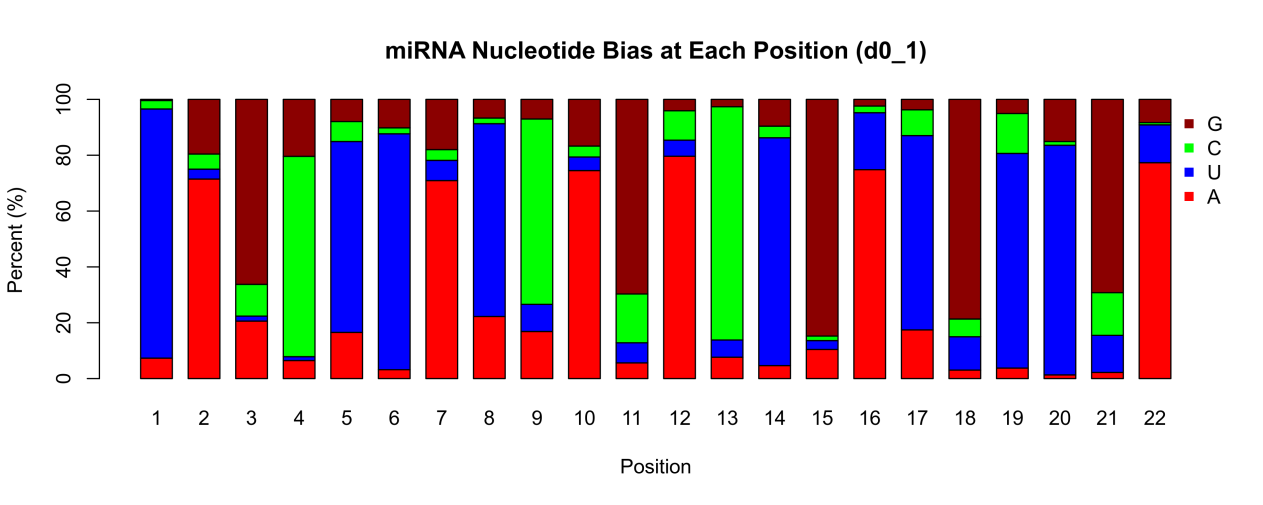


**b.**


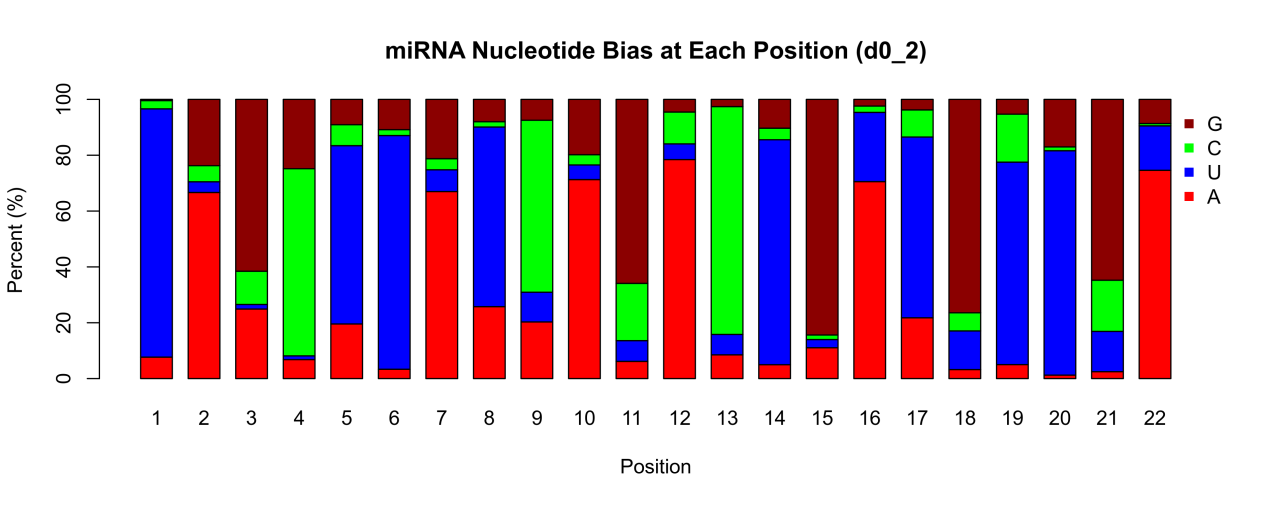


**c.**


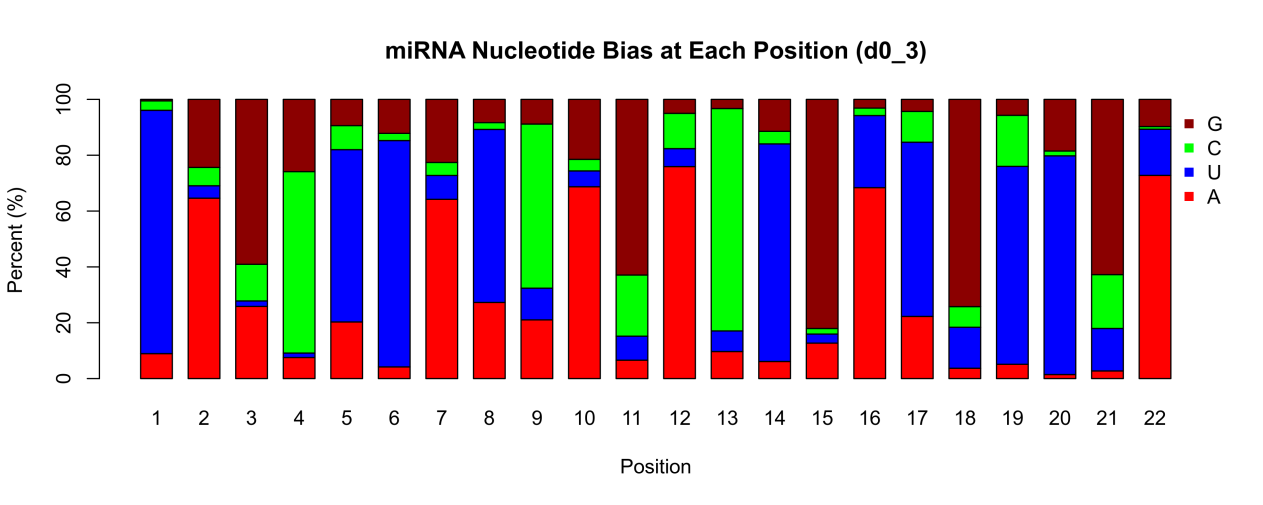


**d.**


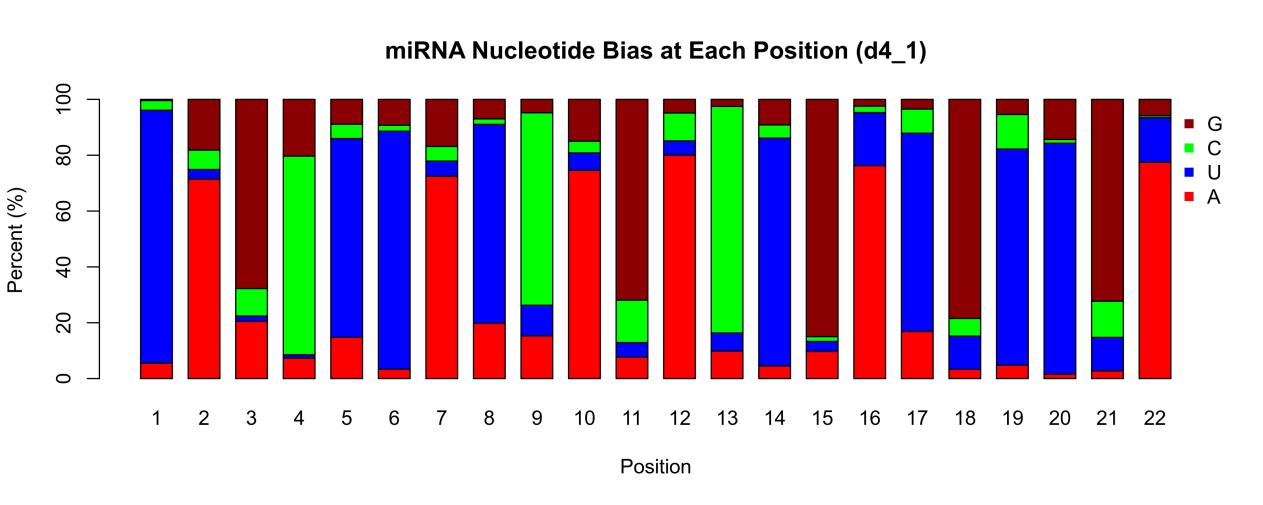


**e.**


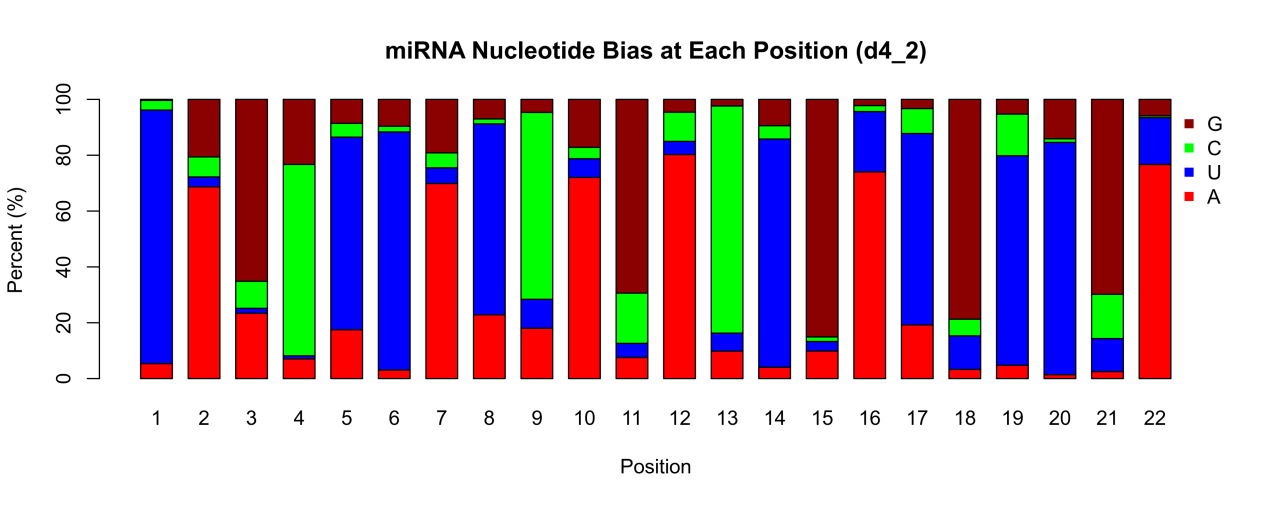


**f.**


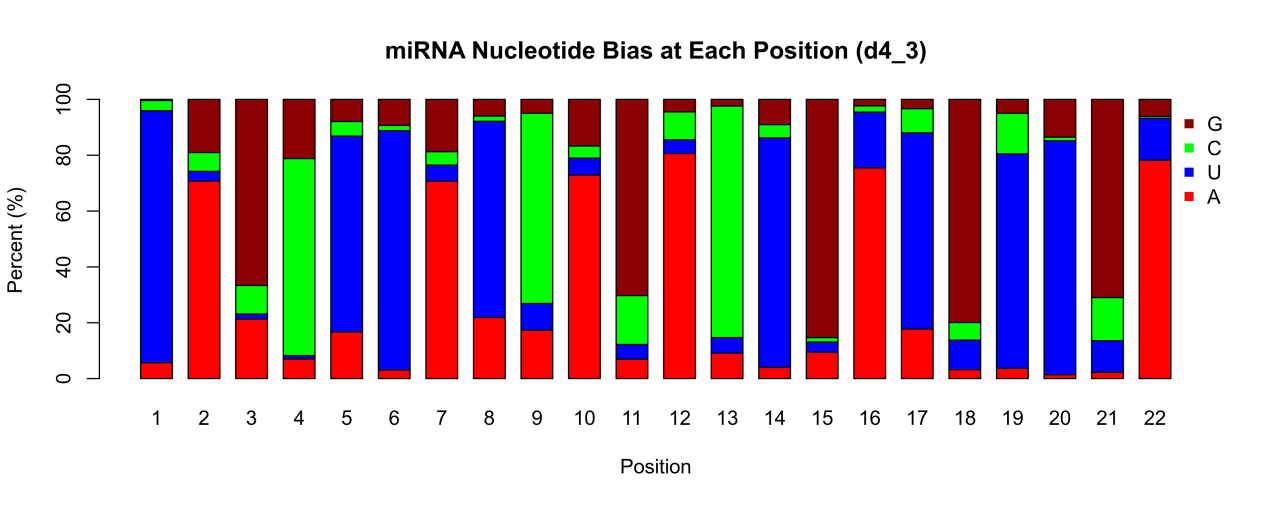


**g.**


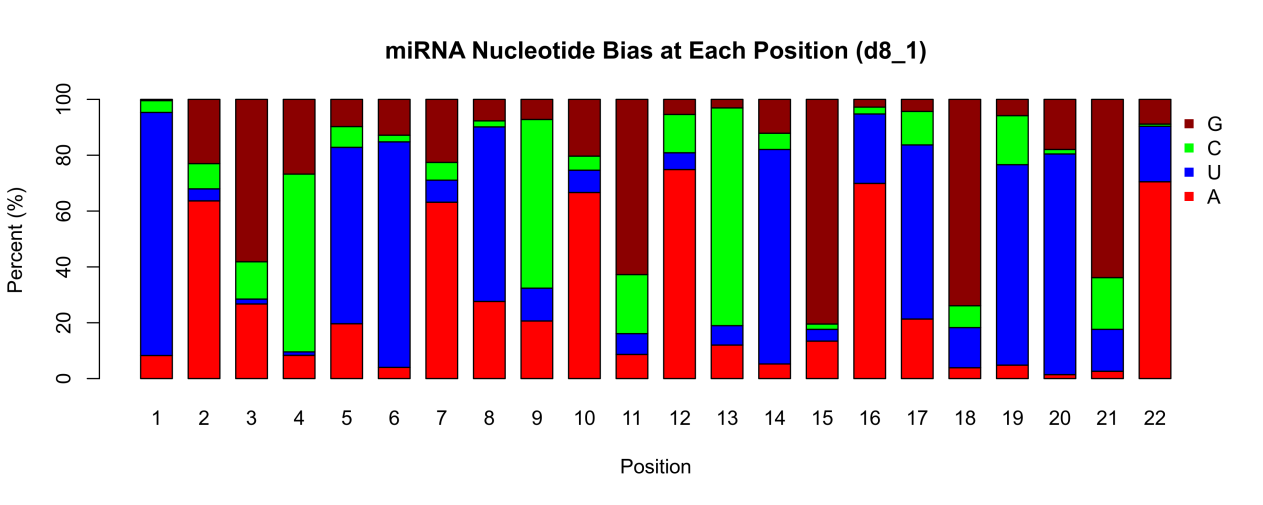


**h.**


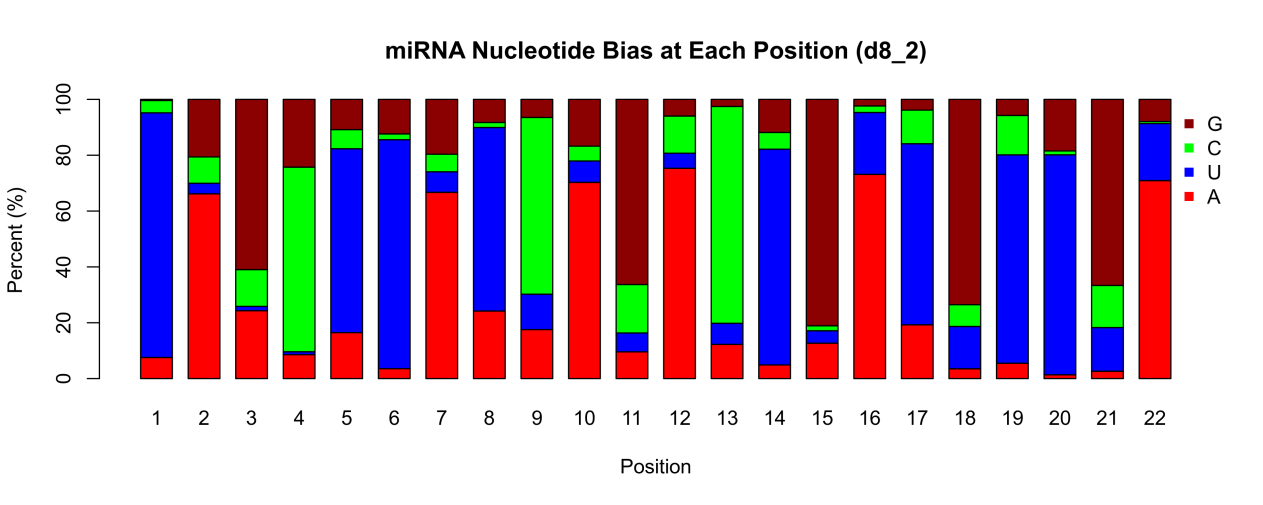


**i.**


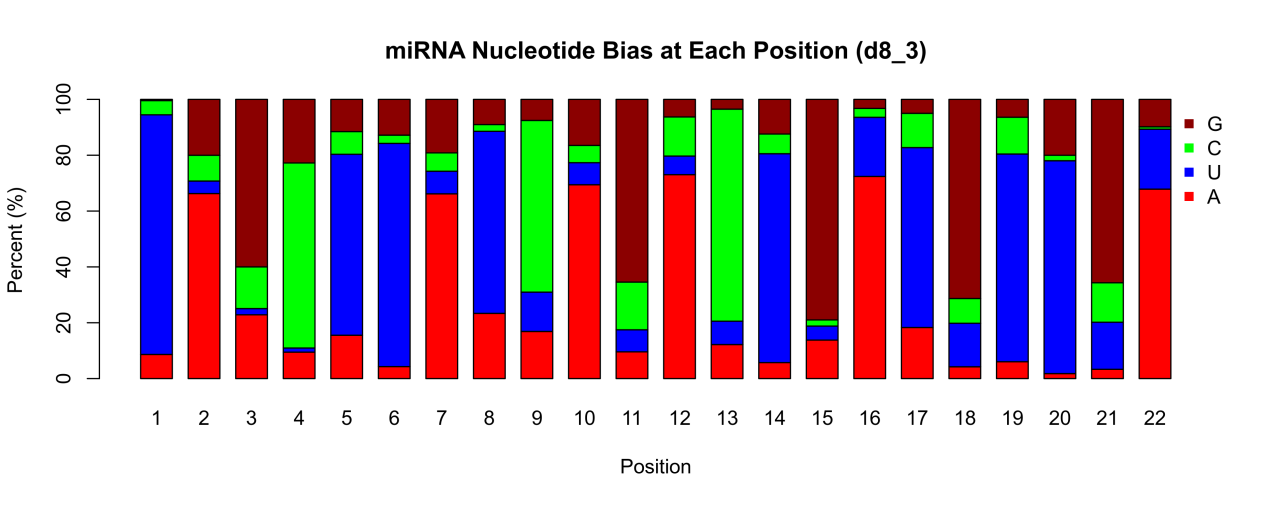

Supplement: Supplementary file 1 [file 75fcc8573aec251b9391a217.docx]

**Figure S6.** The TPM density distribution of the miRNA expression level.


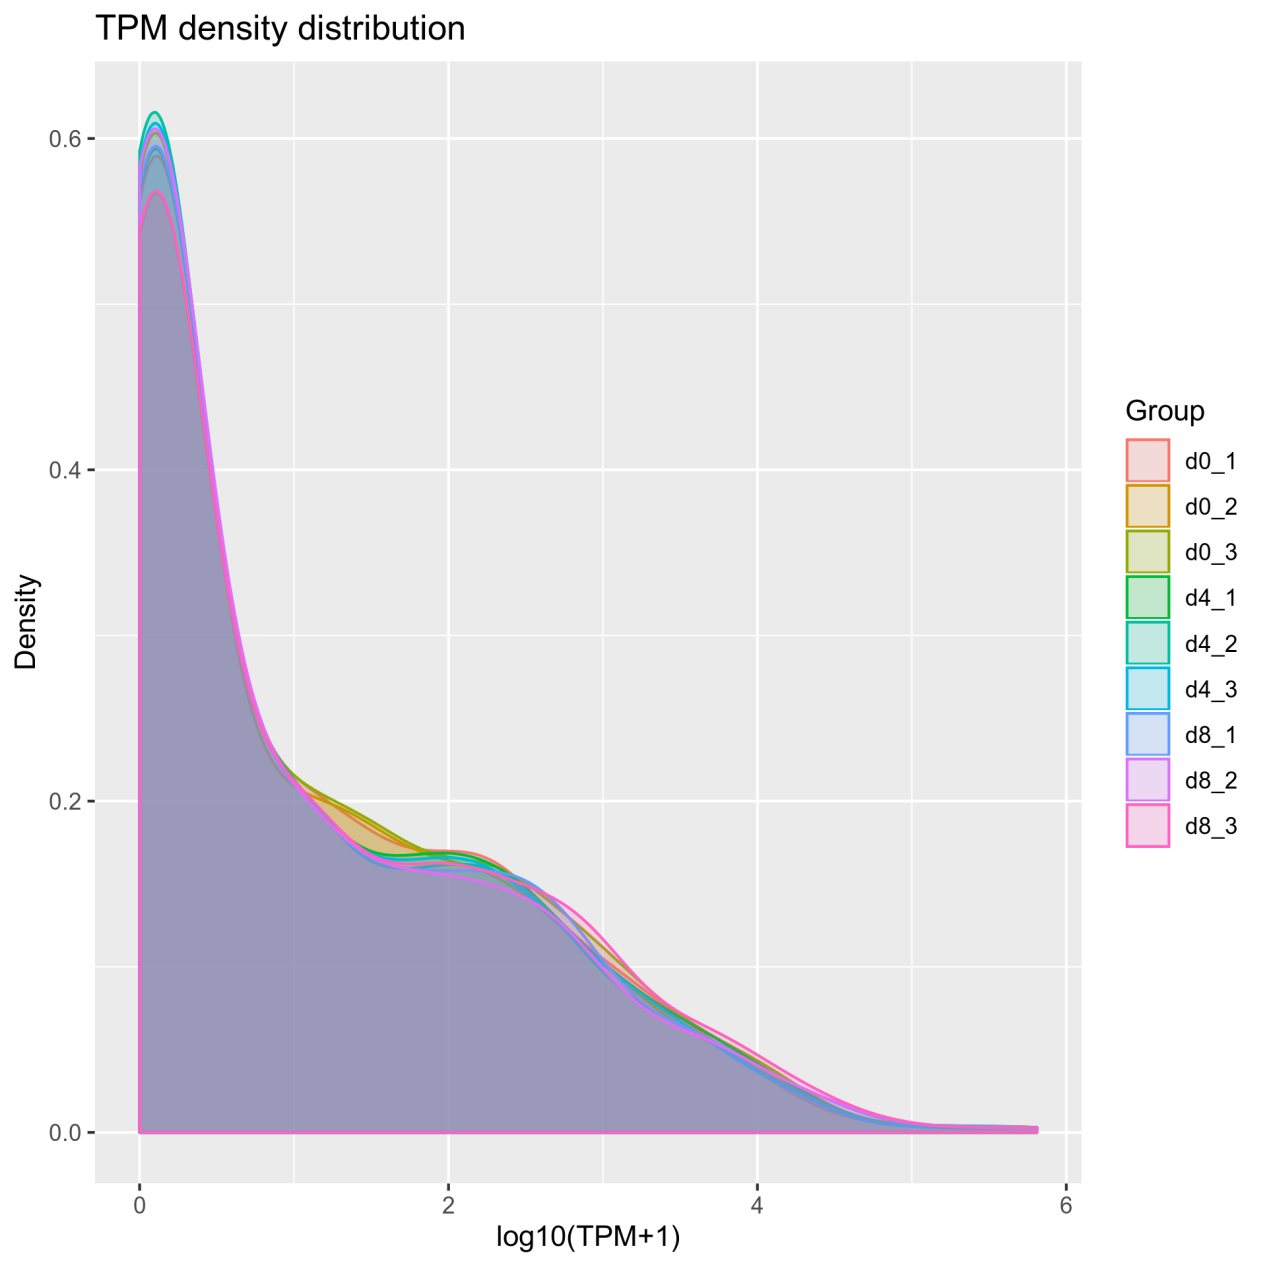

Supplement: Supplementary file 2 [file 7adade1083cd57e9880321ab.docx]
